# Supplementary material for: Tumor fibroblast–derived epiregulin promotes growth of colitis-associated neoplasms through ERK
Source: JCI journal article supplement (doi:10.1172/jci63748), 2013-03-14
Supplement: sd1 [file 1]

## **SUPPLEMENTAL FIGURES LEGENDS:**

*Figure S1. Gene expression studies demonstrate differential expression of EREG, but not other EGF-like ligands in the mouse model of CAC*

Differential expression analysis between mouse models of CAC and sporadic CRC was performed by high density microarrays, as described in materials and methods. Results are shown for individual EGF-like ligands.

*Figure S2. Ereg<sup>-/-</sup> mice show a less prominent difference in colitis after recovery from the immediate ulcerative damage.*

(A and B) Experimental colitis was induced by three cycles of DSS (2.5%) in wild-type controls and *Ereg<sup>-/-</sup>* mice, and inflammation was endoscopically assessed at day 60. Data are from one out of two experiments and represent mean values  $\pm$  SD ( $n = 5$  per group).

*Table S1.*

List of differentially expressed genes per subgroup with the greatest up or down.

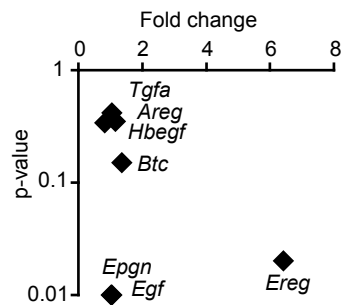

Figure S1.

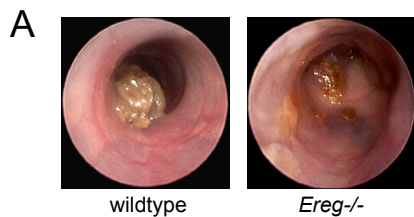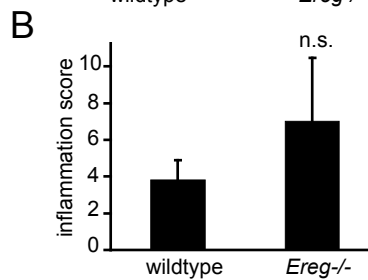

Figure S2.

## Differentially expressed genes per subgroup with the greatest up or down

## upregulated

## downregulated

| sporadic CRC vs. control |             | CAC vs. control |             | sporadic CRC vs. control |             | CAC vs. control |             |
|--------------------------|-------------|-----------------|-------------|--------------------------|-------------|-----------------|-------------|
| Gene Symbol              | Fold change | Gene Symbol     | Fold change | Gene Symbol              | Fold change | Gene Symbol     | Fold change |
| Ptn                      | 162,44      | Igl-V1          | 43,0        | Cyp2f2                   | 102,09      | Slco2a1         | 7,8         |
| Pfn2                     | 140,07      | Krt36           | 40,0        | Mep1b                    | 80,11       | Sectm1          | 7,1         |
| Sox17                    | 117,63      | Ndg1            | 22,9        | Atp12a                   | 62,54       | Pice1           | 7,1         |
| Pycr1                    | 111,17      | Thbs1           | 17,8        | BC018285                 | 59,74       | Sectm1          | 6,6         |
| Cadps                    | 85,85       | Ereg            | 16,6        | 4631408O11Rik            | 51,32       | D630002G06Rik   | 6,6         |
| Tesc                     | 85,76       | Prss22          | 14,9        | Sult1b1                  | 48,72       | Hba-a1          | 6,5         |
| Serpina11                | 55,40       | Tagln           | 11,6        | Aldob                    | 45,94       | Slc4a4          | 5,8         |
| Cdkn1c                   | 44,72       | Lgals2          | 11,1        | Acta1                    | 34,66       | Slco2a1         | 5,8         |
| Usp18                    | 39,46       | Ascl2           | 8,5         | 2010001M06Rik            | 33,19       | Srr             | 5,6         |
| Isl1                     | 32,36       | Ighg            | 8,3         | Aldh1a7                  | 26,33       | Sprr2k          | 5,5         |
| Bcam                     | 31,55       | Cyr61           | 8,1         | 1810010G06Rik            | 25,46       | Cdx2            | 5,2         |
| Cfi                      | 31,01       | Siva            | 7,8         | Clca3                    | 23,70       | Al451617        | 4,9         |
| Etv5                     | 28,97       | Col5a1          | 6,7         | Cabc1                    | 23,44       | Foxo3a          | 4,4         |
| Mal                      | 28,52       | Aldh1a3         | 6,4         | Clec2h                   | 23,17       | Plekhg6         | 4,3         |
| Cubn                     | 27,10       | Cyr61           | 6,0         | Mrze                     | 21,87       | Stk17b          | 4,2         |
| Mpeg1                    | 24,68       | Slc15a3         | 5,8         | 2610528A11Rik            | 21,85       | Hoxa13          | 4,2         |
| Tex15                    | 21,49       | Esam1           | 5,7         | Saa1                     | 20,94       | Stk10           | 4,1         |
| Rasl11b                  | 21,44       | Hells           | 5,4         | Arc                      | 20,63       | 2210010L05Rik   | 4,0         |
| Stx1a                    | 20,99       | Mrc1            | 5,4         | Saa1                     | 19,40       | Gpr137b         | 3,9         |
| Rarb                     | 20,74       | Crem            | 5,4         | Wfdc2                    | 19,16       | Usp53           | 3,9         |

Table S1.
